# Supplementary material for: Inkjet printing and photonic sintering of silver and copper oxide nanoparticles for ultra-low-cost conductive patterns
Source: Royal Society of Chemistry journal article supplement (doi:10.1039/c6tc00628k), 2016-01-01
Supplement: c6tc00628k1.pdf [file c6tc00628k1.pdf]

## Inkjet Printing and Photonic Sintering of Silver and Copper Oxide Nanoparticles for Ultra-Low-Cost Conductive Patterns

Andreas Albrecht<sup>a</sup>, Almudena Rivadeneyra<sup>a</sup>, José F. Salmeron<sup>a</sup>, Alaa Abdellah<sup>a</sup>, and Paolo Lugli<sup>a</sup>

Suppl. Table 1: Substrates found suitable for inkjet printing of silver and copper oxide nanoparticle ink are divided into four groups. Substrates numbered with P are white paper-based and porous, with T are transparent polymer-based and porous, W are white polymer-based and porous N are white paper-based and non-porous, M are transparent polymer-based and non-porous.

| No. | Manufacturer           | Product Name                           | R <sub>s</sub> Ag pre (mΩ/□) | R <sub>s</sub> Ag post (mΩ/□) | R <sub>s</sub> Cu post (mΩ/□) |
|-----|------------------------|----------------------------------------|------------------------------|-------------------------------|-------------------------------|
| P1  | Mitsubishi Paper Mills | Nano Benefit Series NB-RC-3GR120       | 794                          | 71.0                          | 820                           |
| P2  | Schoeller Technocell   | p_e:smart type 2                       | 40.1 × 10 <sup>3</sup>       | 179                           |                               |
| P3  | Schoeller Technocell   | p_e:smart type 3                       | 2324                         | 61.1                          | 1230                          |
| P4  | Dataplot               | Emblem WAPUM Glossy 240g               | 1165                         | 73.6                          | 710                           |
| P5  | Pelikan                | Geha Photo paper P05                   | 3079                         | 78.1                          | 335                           |
| P6  | Canon                  | Glossy Photographic Paper              | 2819                         | 94.4                          | 484                           |
| P7  | HP                     | Universal Semigloss Photographic Paper | 1862                         | 55.4                          | 533                           |
| P8  | Canon                  | Semi-Matte Photographic Paper          | 385                          | 113                           | 484                           |
| P9  | Dataplot               | Emblem WAPUM Semimatte 240g            | 3496                         | 74.2                          | 430                           |
| T1  | Mitsubishi Paper Mills | Nano Benefit Series NB-TP-3GU100       | 473                          | 74.1                          | 664                           |
| T2  | Novacentrix            | Novele IJ-220                          | 5471                         | 64.7                          | 536                           |
| T3  | Mitsubishi Paper Mills | InkJet Film UC100                      | 52.0 × 10 <sup>3</sup>       | 67.7                          | 454                           |
| T4  | Folex                  | Reprojet P HD                          | 1504                         | 195                           | 1966                          |
| T5  | Folex                  | Reprojet P HDM                         | 1875                         | 143                           | 1134                          |
| T6  | ColorGATE              | Reprofilm HD                           | 2519                         | 135                           | 1784                          |
| T7  | ColorGATE              | Screenfilm Waterbased                  | 2375                         | 124                           | 1309                          |
| T8  | ESC                    | ScreenJet Film                         | 403                          | 156                           | 456                           |
| T9  | R. Rauch               | Repro-UV                               | 1211                         | 149                           | 2155                          |
| T10 | R. Rauch               | Repro-UV II                            | 1029                         | 151                           | 1428                          |
| W1  | Mitsubishi Paper Mills | Nano Benefit Series NB-WF-3GF100       | 794                          | 67.7                          | 801                           |
| W2  | Unknown                | Greyback                               | 863                          | 130                           | 2644                          |
| N1  | Schoeller Technocell   | p_e:smart type 1                       | 131 × 10 <sup>3</sup>        | 361                           | > 1 × 10 <sup>9</sup>         |
| N2  | Arjowiggins            | Powercoat HD 230                       | > 1 × 10 <sup>12</sup>       | > 1 × 10 <sup>9</sup>         | > 1 × 10 <sup>9</sup>         |
| N3  | Stora Enso             | LumiArt                                | 7.55 × 10 <sup>6</sup>       | 302                           | > 1 × 10 <sup>9</sup>         |
| N4  | Konica Minolta         | Photo Paper                            | 6.90 × 10 <sup>6</sup>       | 267                           | > 1 × 10 <sup>9</sup>         |
| N5  | Stora Enso             | LumiSilk                               | 21.6 × 10 <sup>6</sup>       | 166                           | > 1 × 10 <sup>9</sup>         |
| M1  | MGW Office Supplies    | Clear Laser & Copy Foil                | 2151                         | 195                           | > 1 × 10 <sup>9</sup>         |
| M2  | Viking                 | Transparency Film                      | 2142                         | 150                           | > 1 × 10 <sup>9</sup>         |
| M3  | Folex                  | GO-HC                                  | 2060                         |                               | > 1 × 10 <sup>9</sup>         |

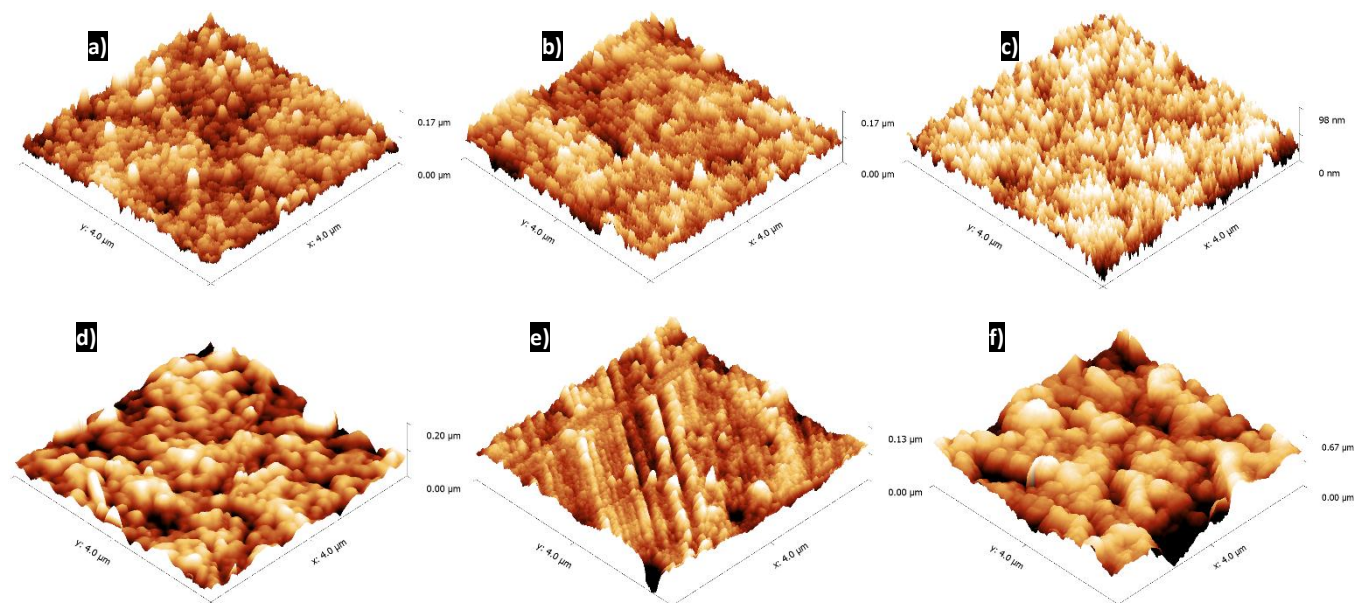

Suppl. Figure 1: AFM images of selected substrates and their roughness within a  $4 \times 4 \mu\text{m}^2$  area:  
 a) P4: 12,0 nm, b) P8: 16,3 nm, c) T7: 7,4 nm, d) M2: 10,1 nm, e) N2: 7,2 nm, f) N3: 24,4 nm

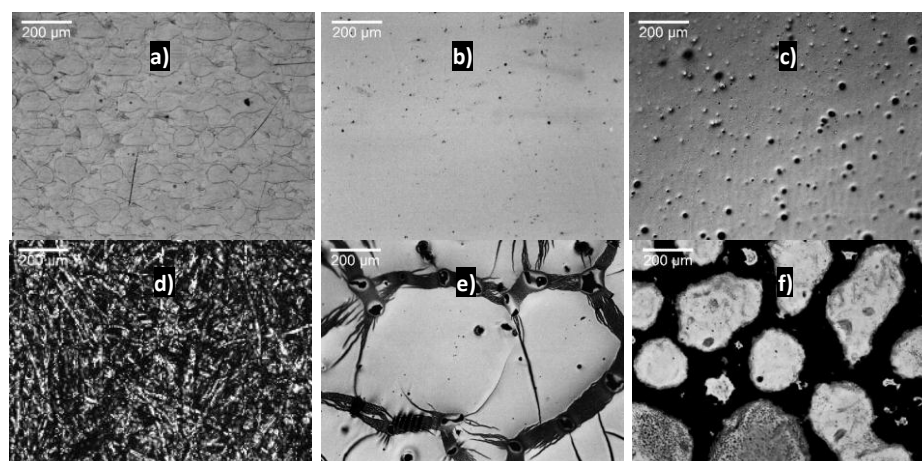

Suppl. Figure 2: Microscope images of printed areas on different substrates: a) porous inkjet media (P9), b) smooth non-porous film. The homogeneous film is disturbed by stains of different sizes. All these three surfaces exhibit a shiny silver layer and low sheet resistances are obtainable. This results in higher brightness of the ink-covered areas in the microscope images. film (N8), c) rough non-porous film, d) absorptive substrates (office paper), e) low-adhesion substrates, f) low-wettability substrates. The silver ink is shown brighter than the substrate. Scale bar:  $200 \mu\text{m}$

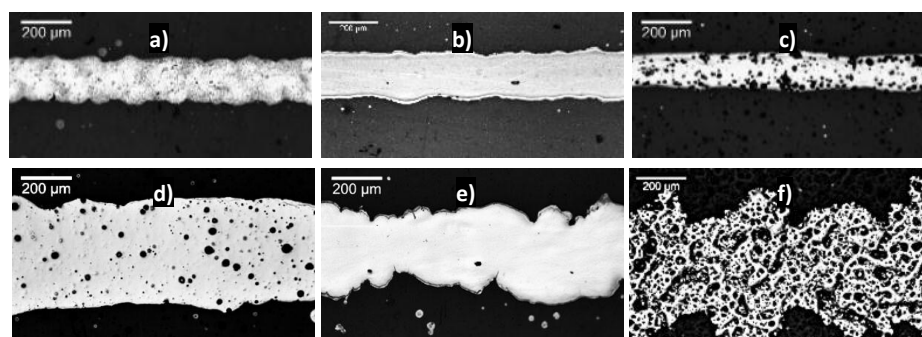

Suppl. Figure 3: Microscope images of printed lines on different groups of substrates. (a) porous inkjet media (P9), (b) smooth non-porous film (M2), (c) rough non-porous film, (d) high-wettability substrates, (e) substrates with high but irregular wettability, (f) rough high-wettability substrates. The silver ink is shown brighter than the substrate.

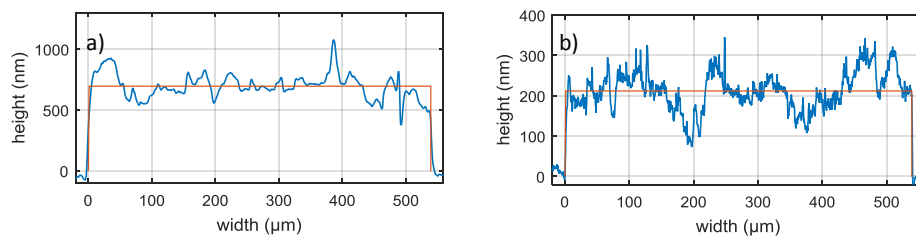

Suppl. Figure 4: a) Profile of a 500  $\mu\text{m}$  silver line on substrate T8 measured with a profilometer. Red: Average height of 696 nm between 0 and 539  $\mu\text{m}$ . b) Profile of a 500  $\mu\text{m}$  copper line on substrate T2 measured with a profilometer. Red: Average height of 212 nm between 0 and 539  $\mu\text{m}$ .

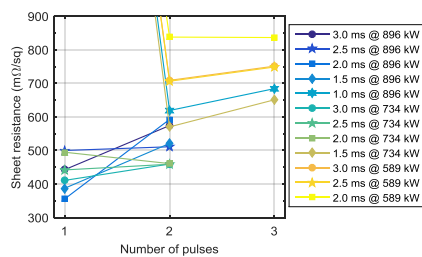

Suppl. Figure 5: Conductivity achieved after a single high-energetic and high-power pulse. For lower energies and powers, two pulses are necessary. A higher number of pulses decreases the sheet resistance.
